# Supplementary material for: Stepwise wiring of the Drosophila olfactory map requires specific Plexin B levels
Source: eLife journal article supplement (doi:10.7554/elife.39088), 2018-08-23
Supplement: supp [file elife-39088-supp-v1.zip]

Archive with 6 entries (6 files):
- elife_poa_e39088_Figure_1_figure_supplement_1.jpg
- elife_poa_e39088_Figure_5_figure_supplement_1.jpg
- elife_poa_e39088_Figure_4_figure_supplement_1.jpg
- elife_poa_e39088_Supplementary_File_1.docx
- elife_poa_e39088_Figure_3_figure_supplement_1.jpg
- elife_poa_e39088_Transparent_Reporting_File.pdf
