# Supplementary figures and images for: Stepwise wiring of the Drosophila olfactory map requires specific Plexin B levels
Source: eLife journal article supplement (doi:10.7554/elife.39088), 2018-08-23

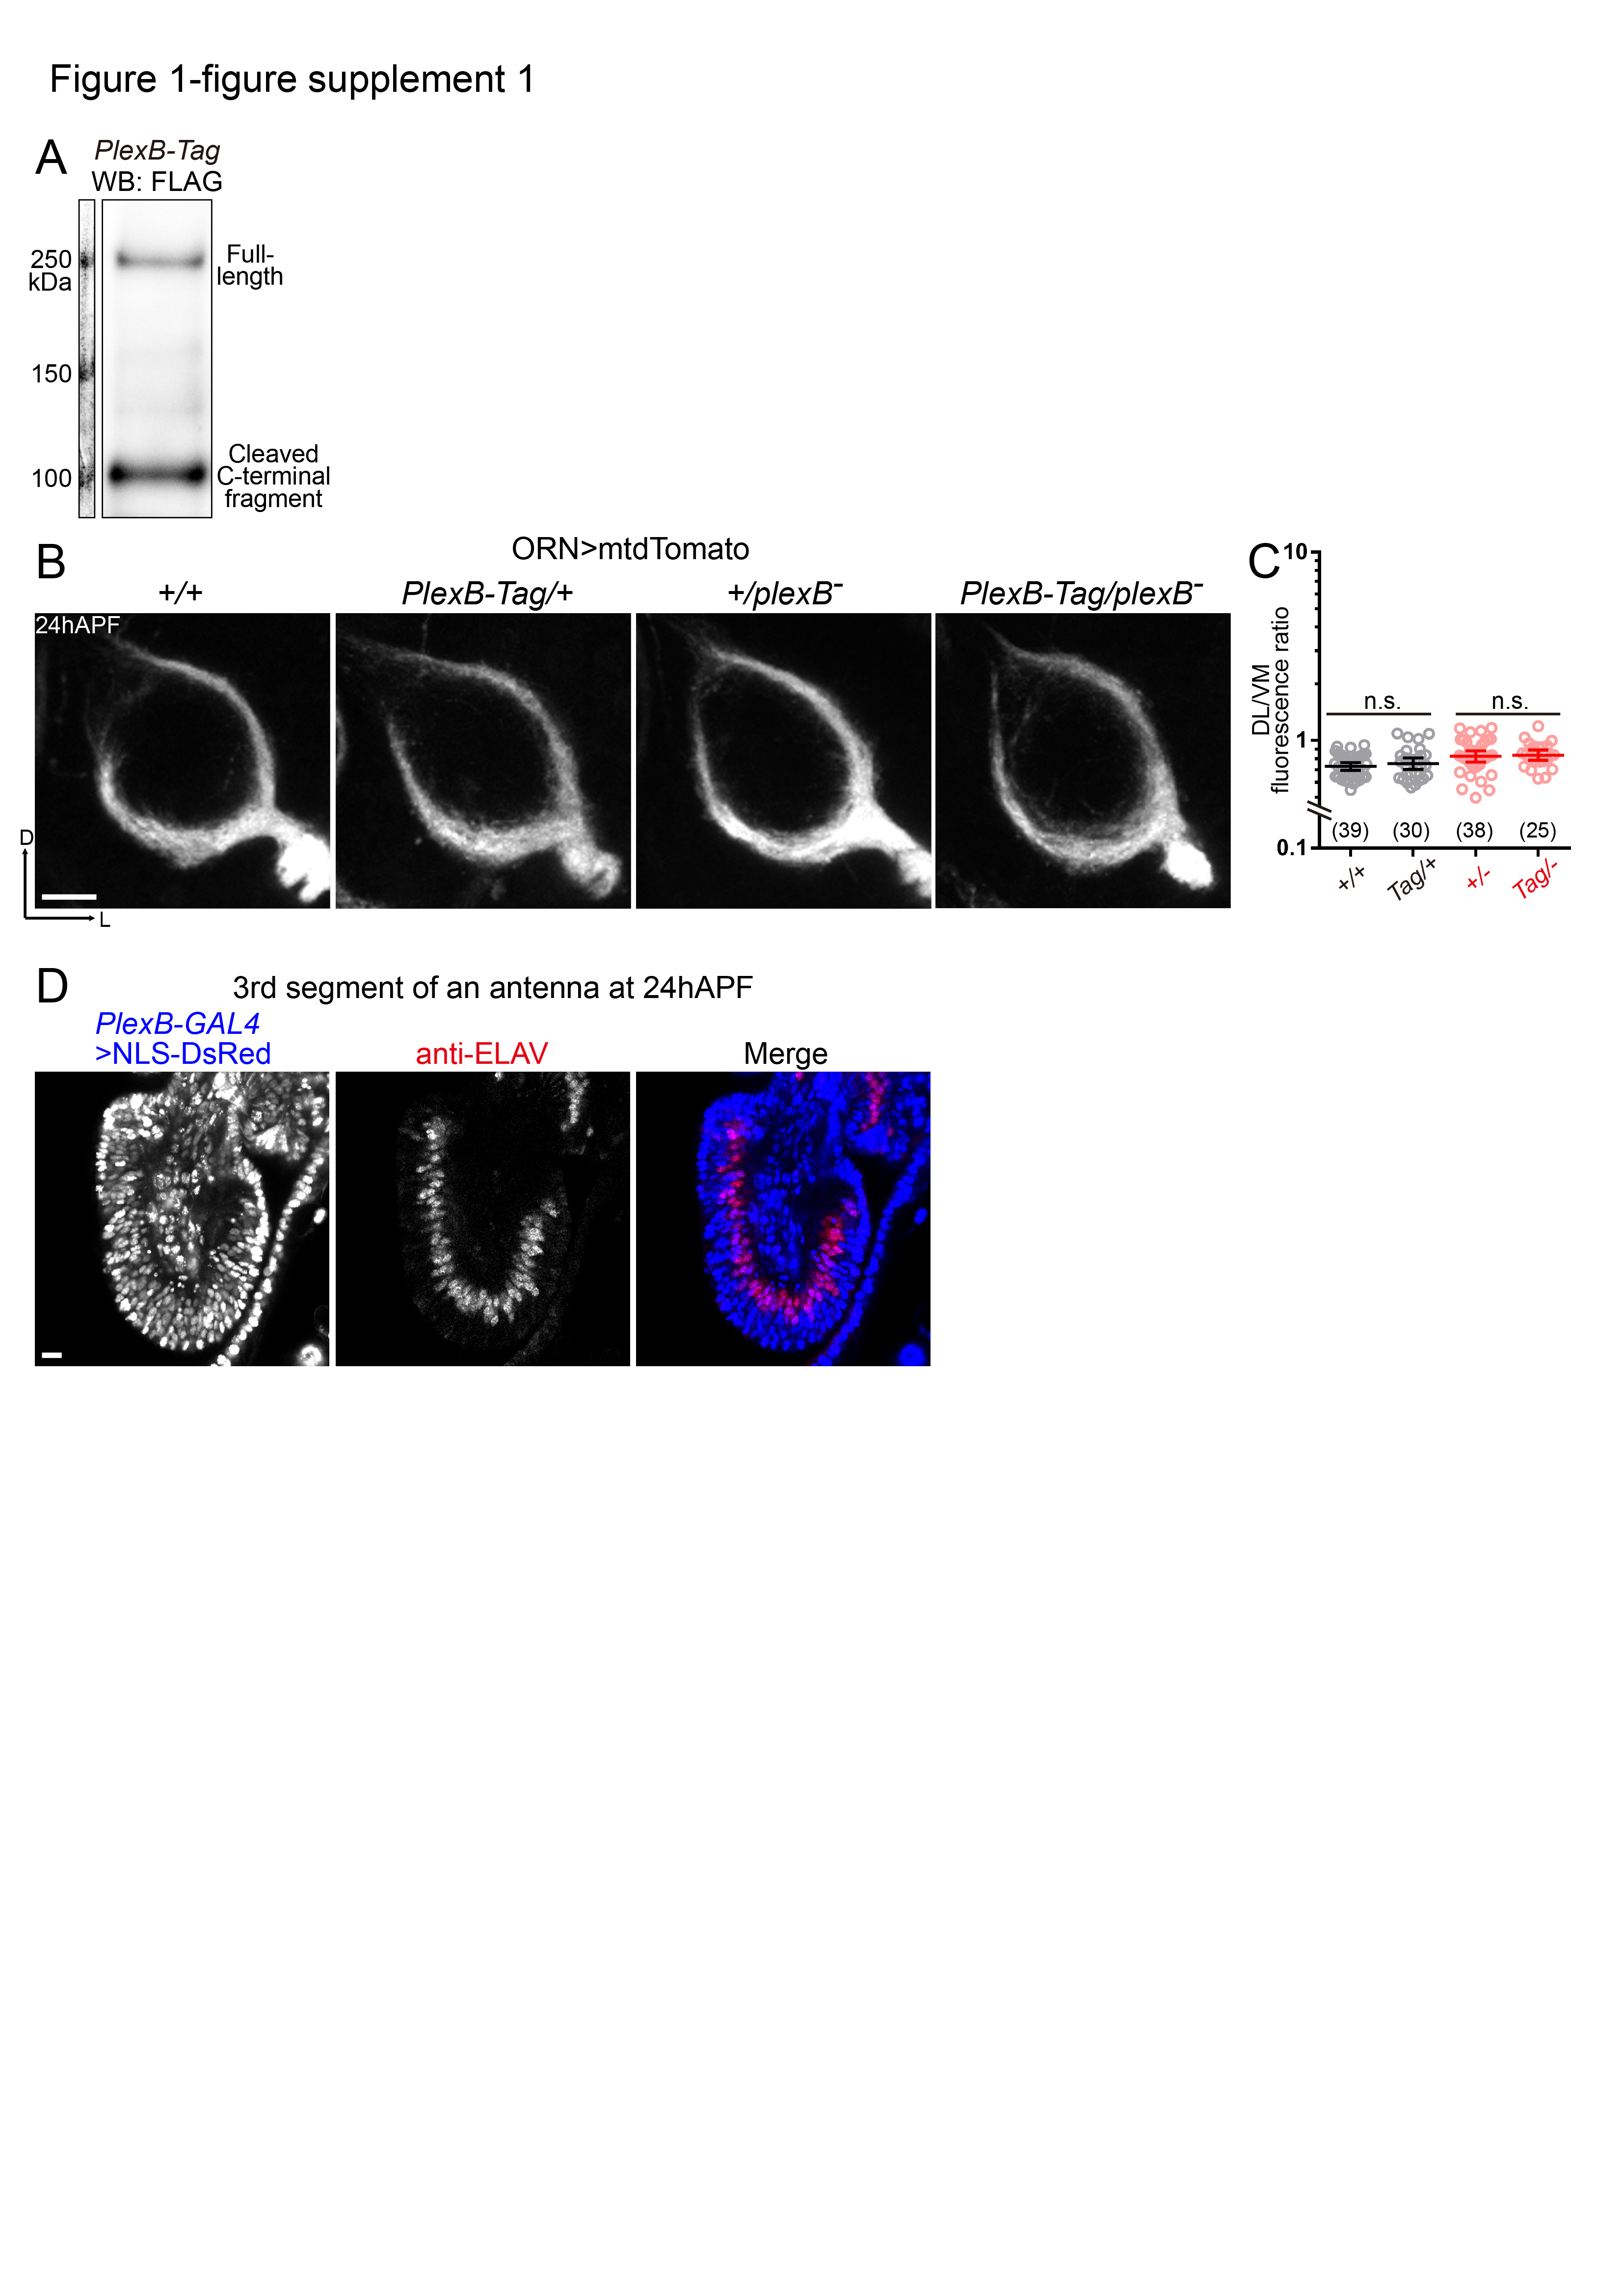

Supplement: supp [file elife-39088-supp-v1.zip › elife_poa_e39088_Figure_1_figure_supplement_1.jpg]

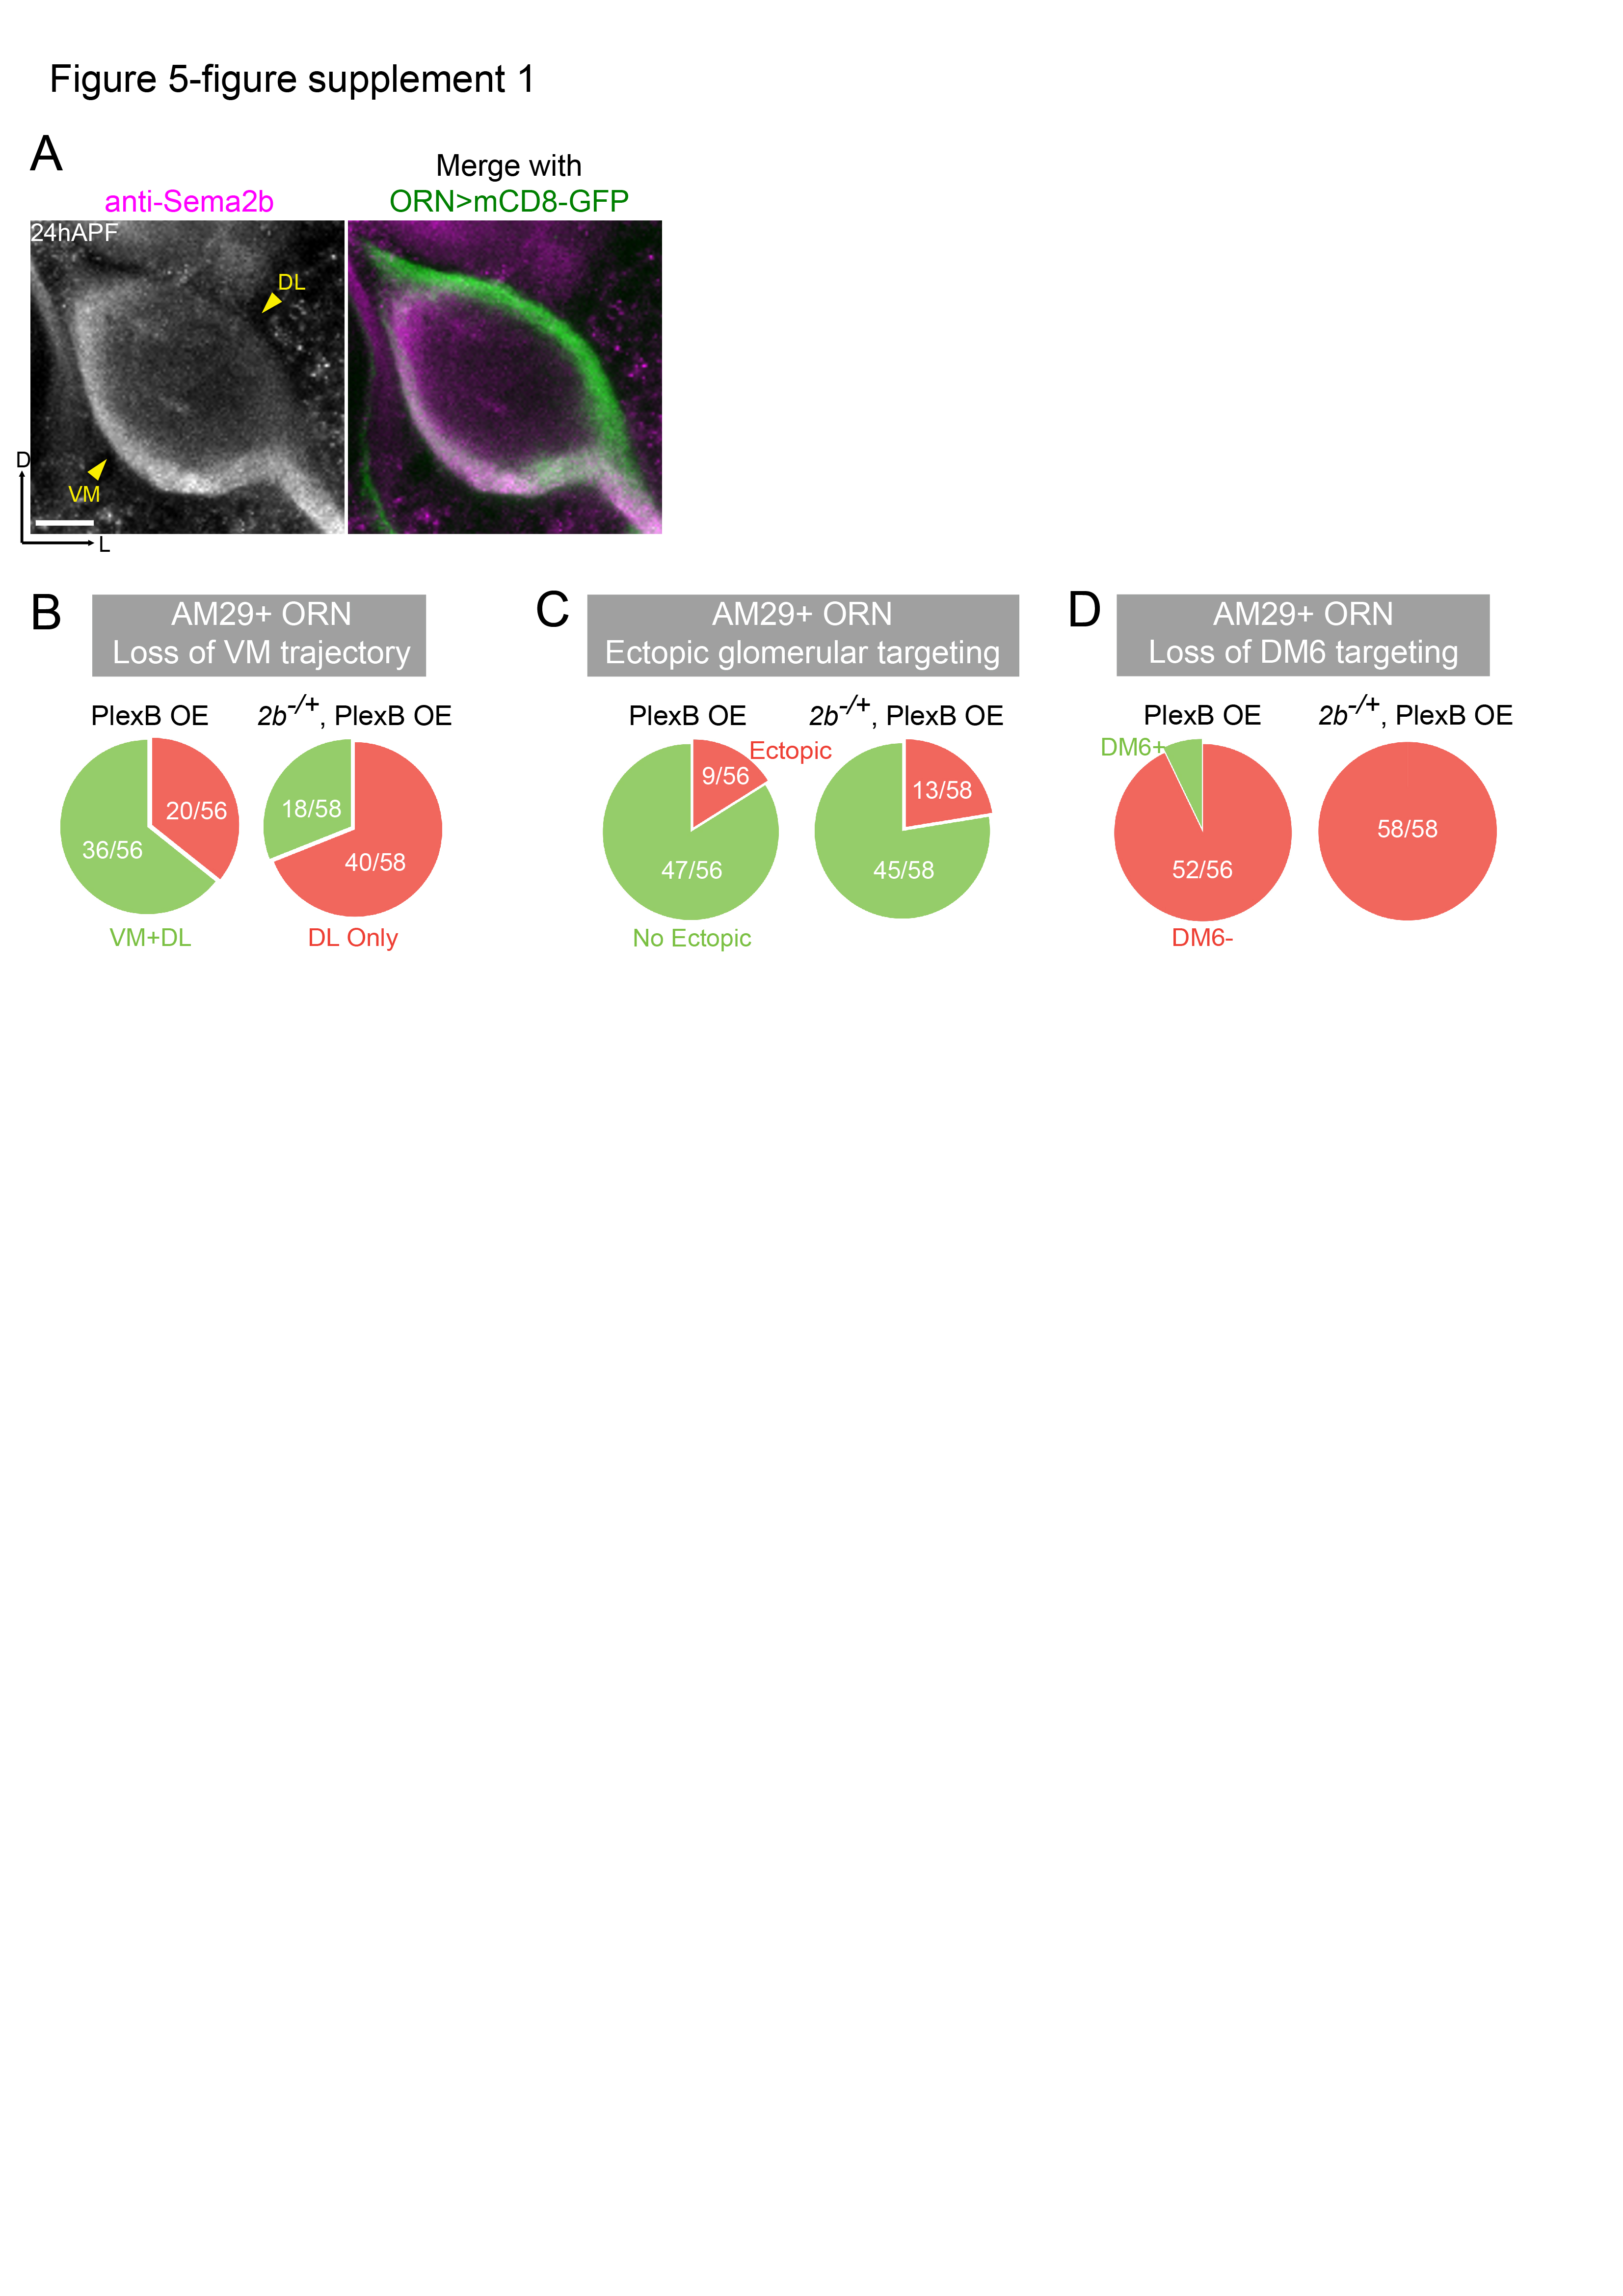

Supplement: supp [file elife-39088-supp-v1.zip › elife_poa_e39088_Figure_5_figure_supplement_1.jpg]

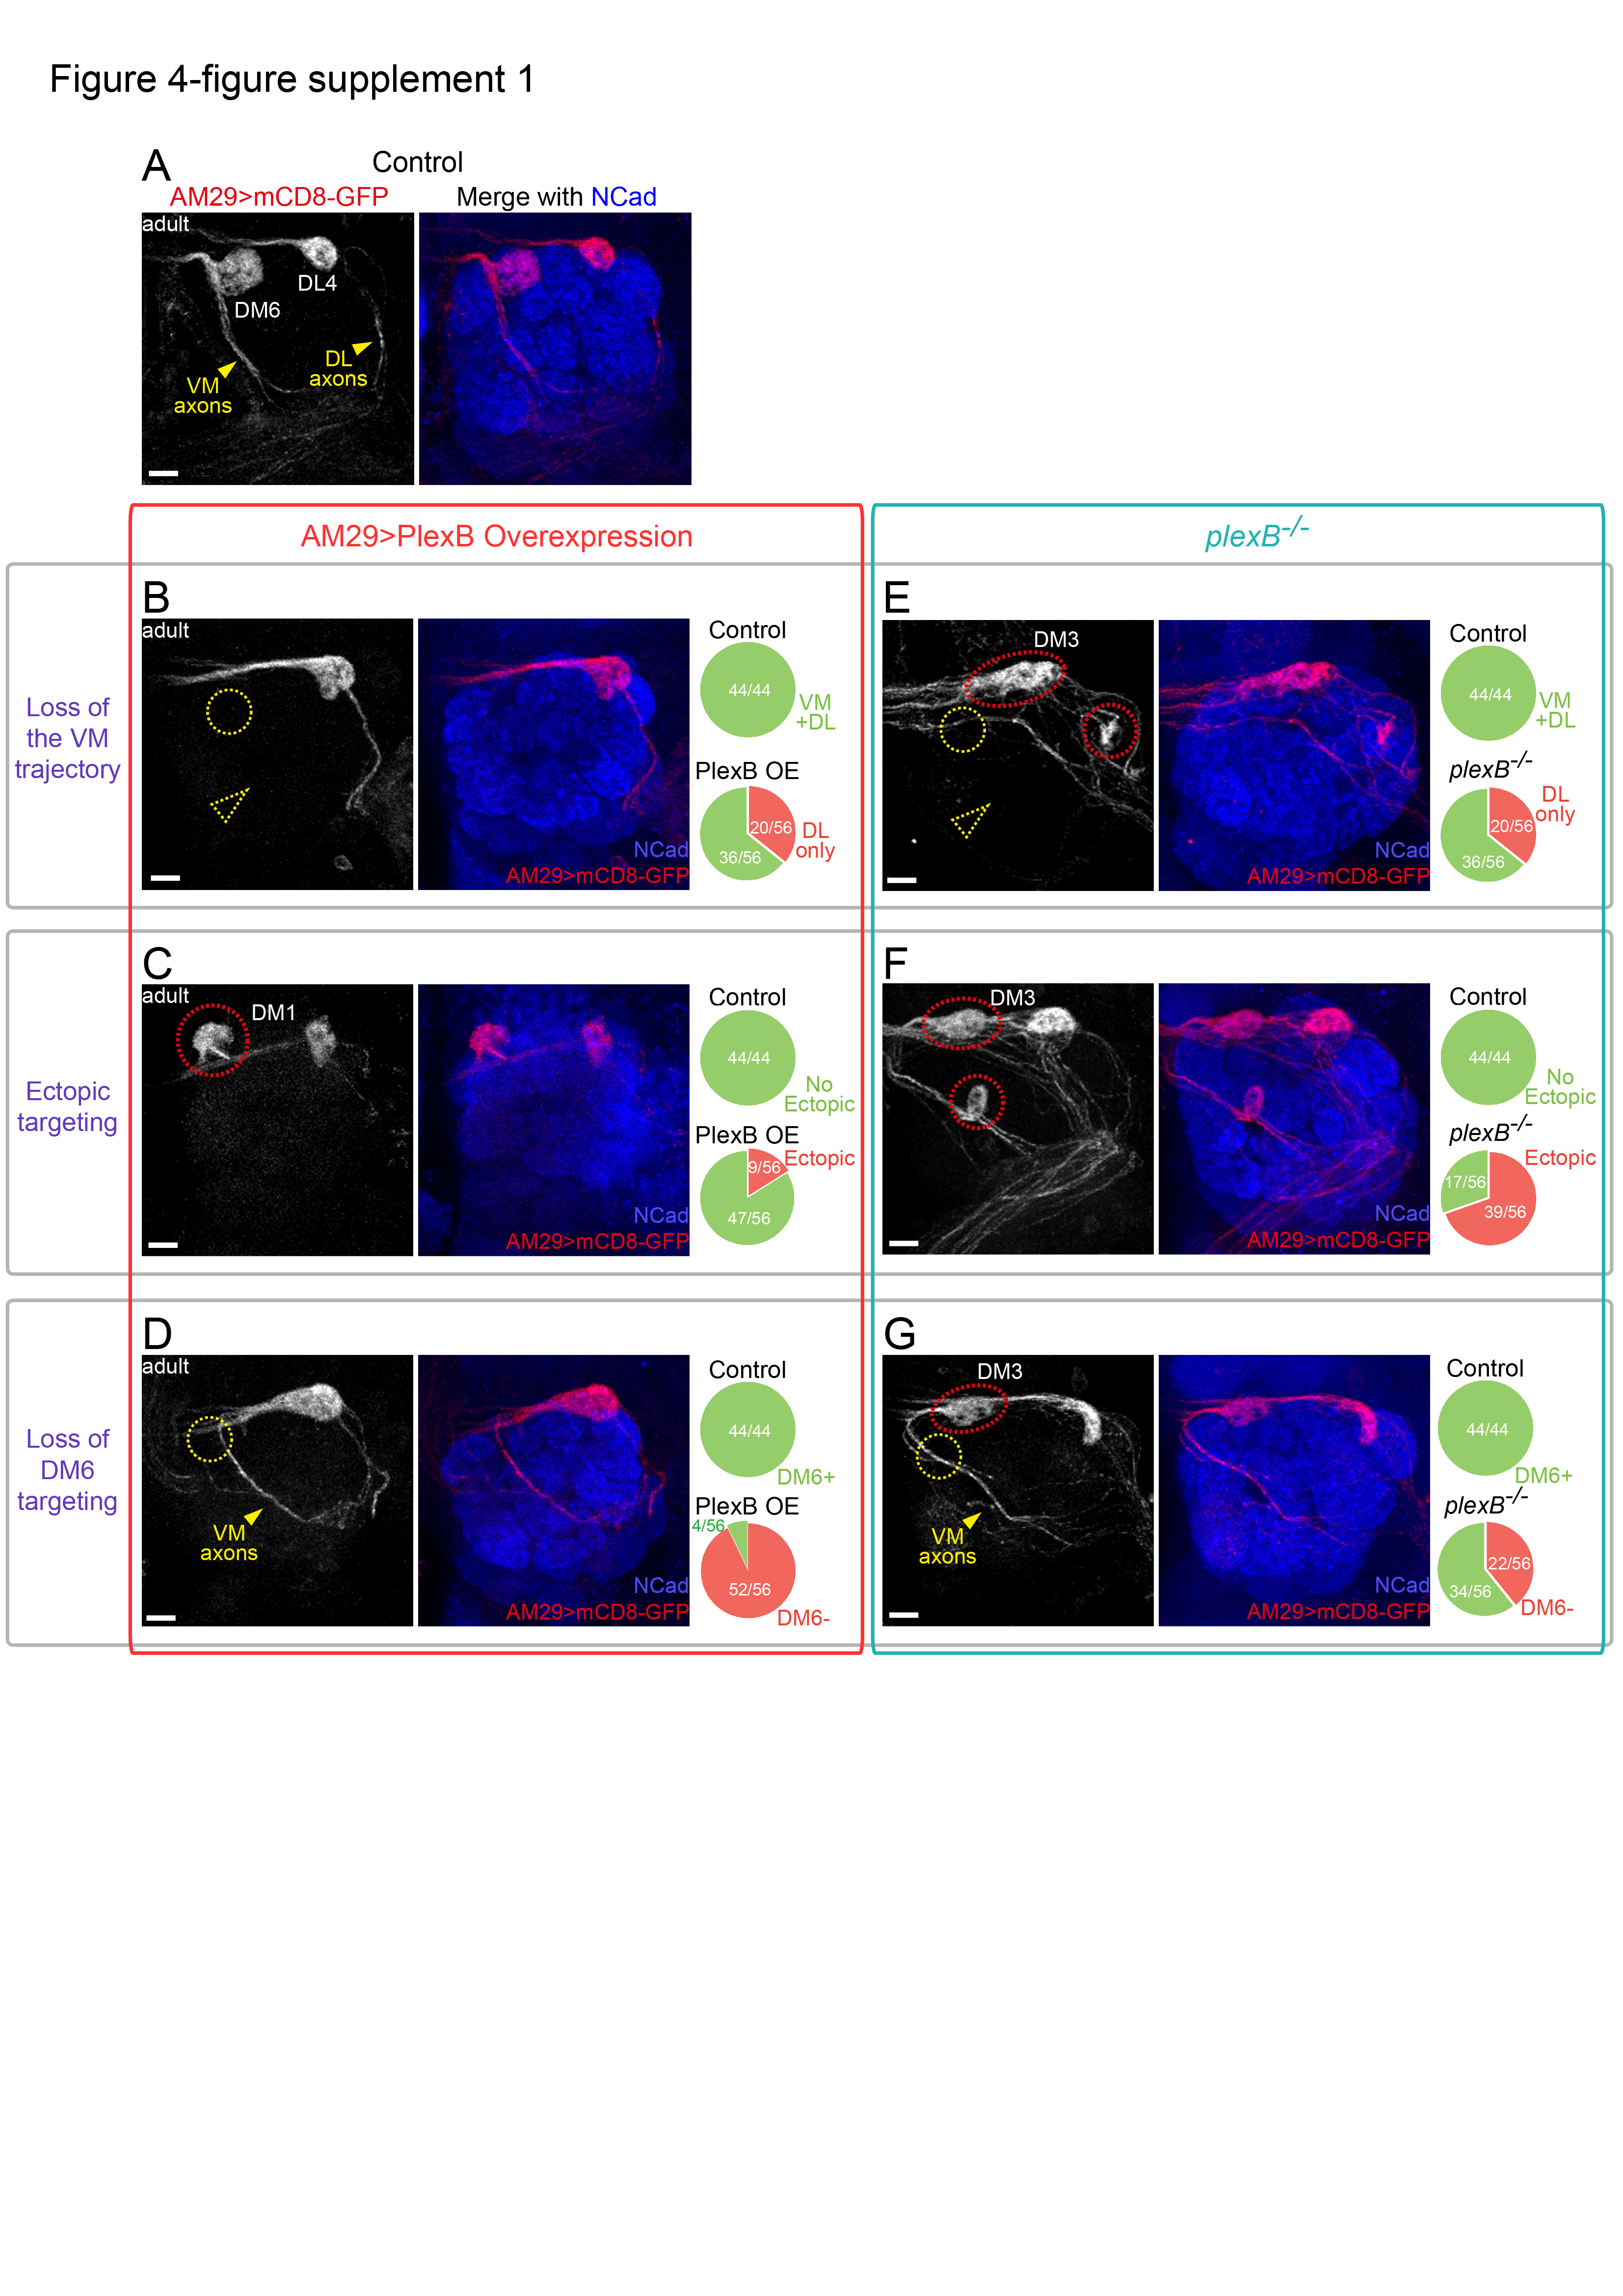

Supplement: supp [file elife-39088-supp-v1.zip › elife_poa_e39088_Figure_4_figure_supplement_1.jpg]

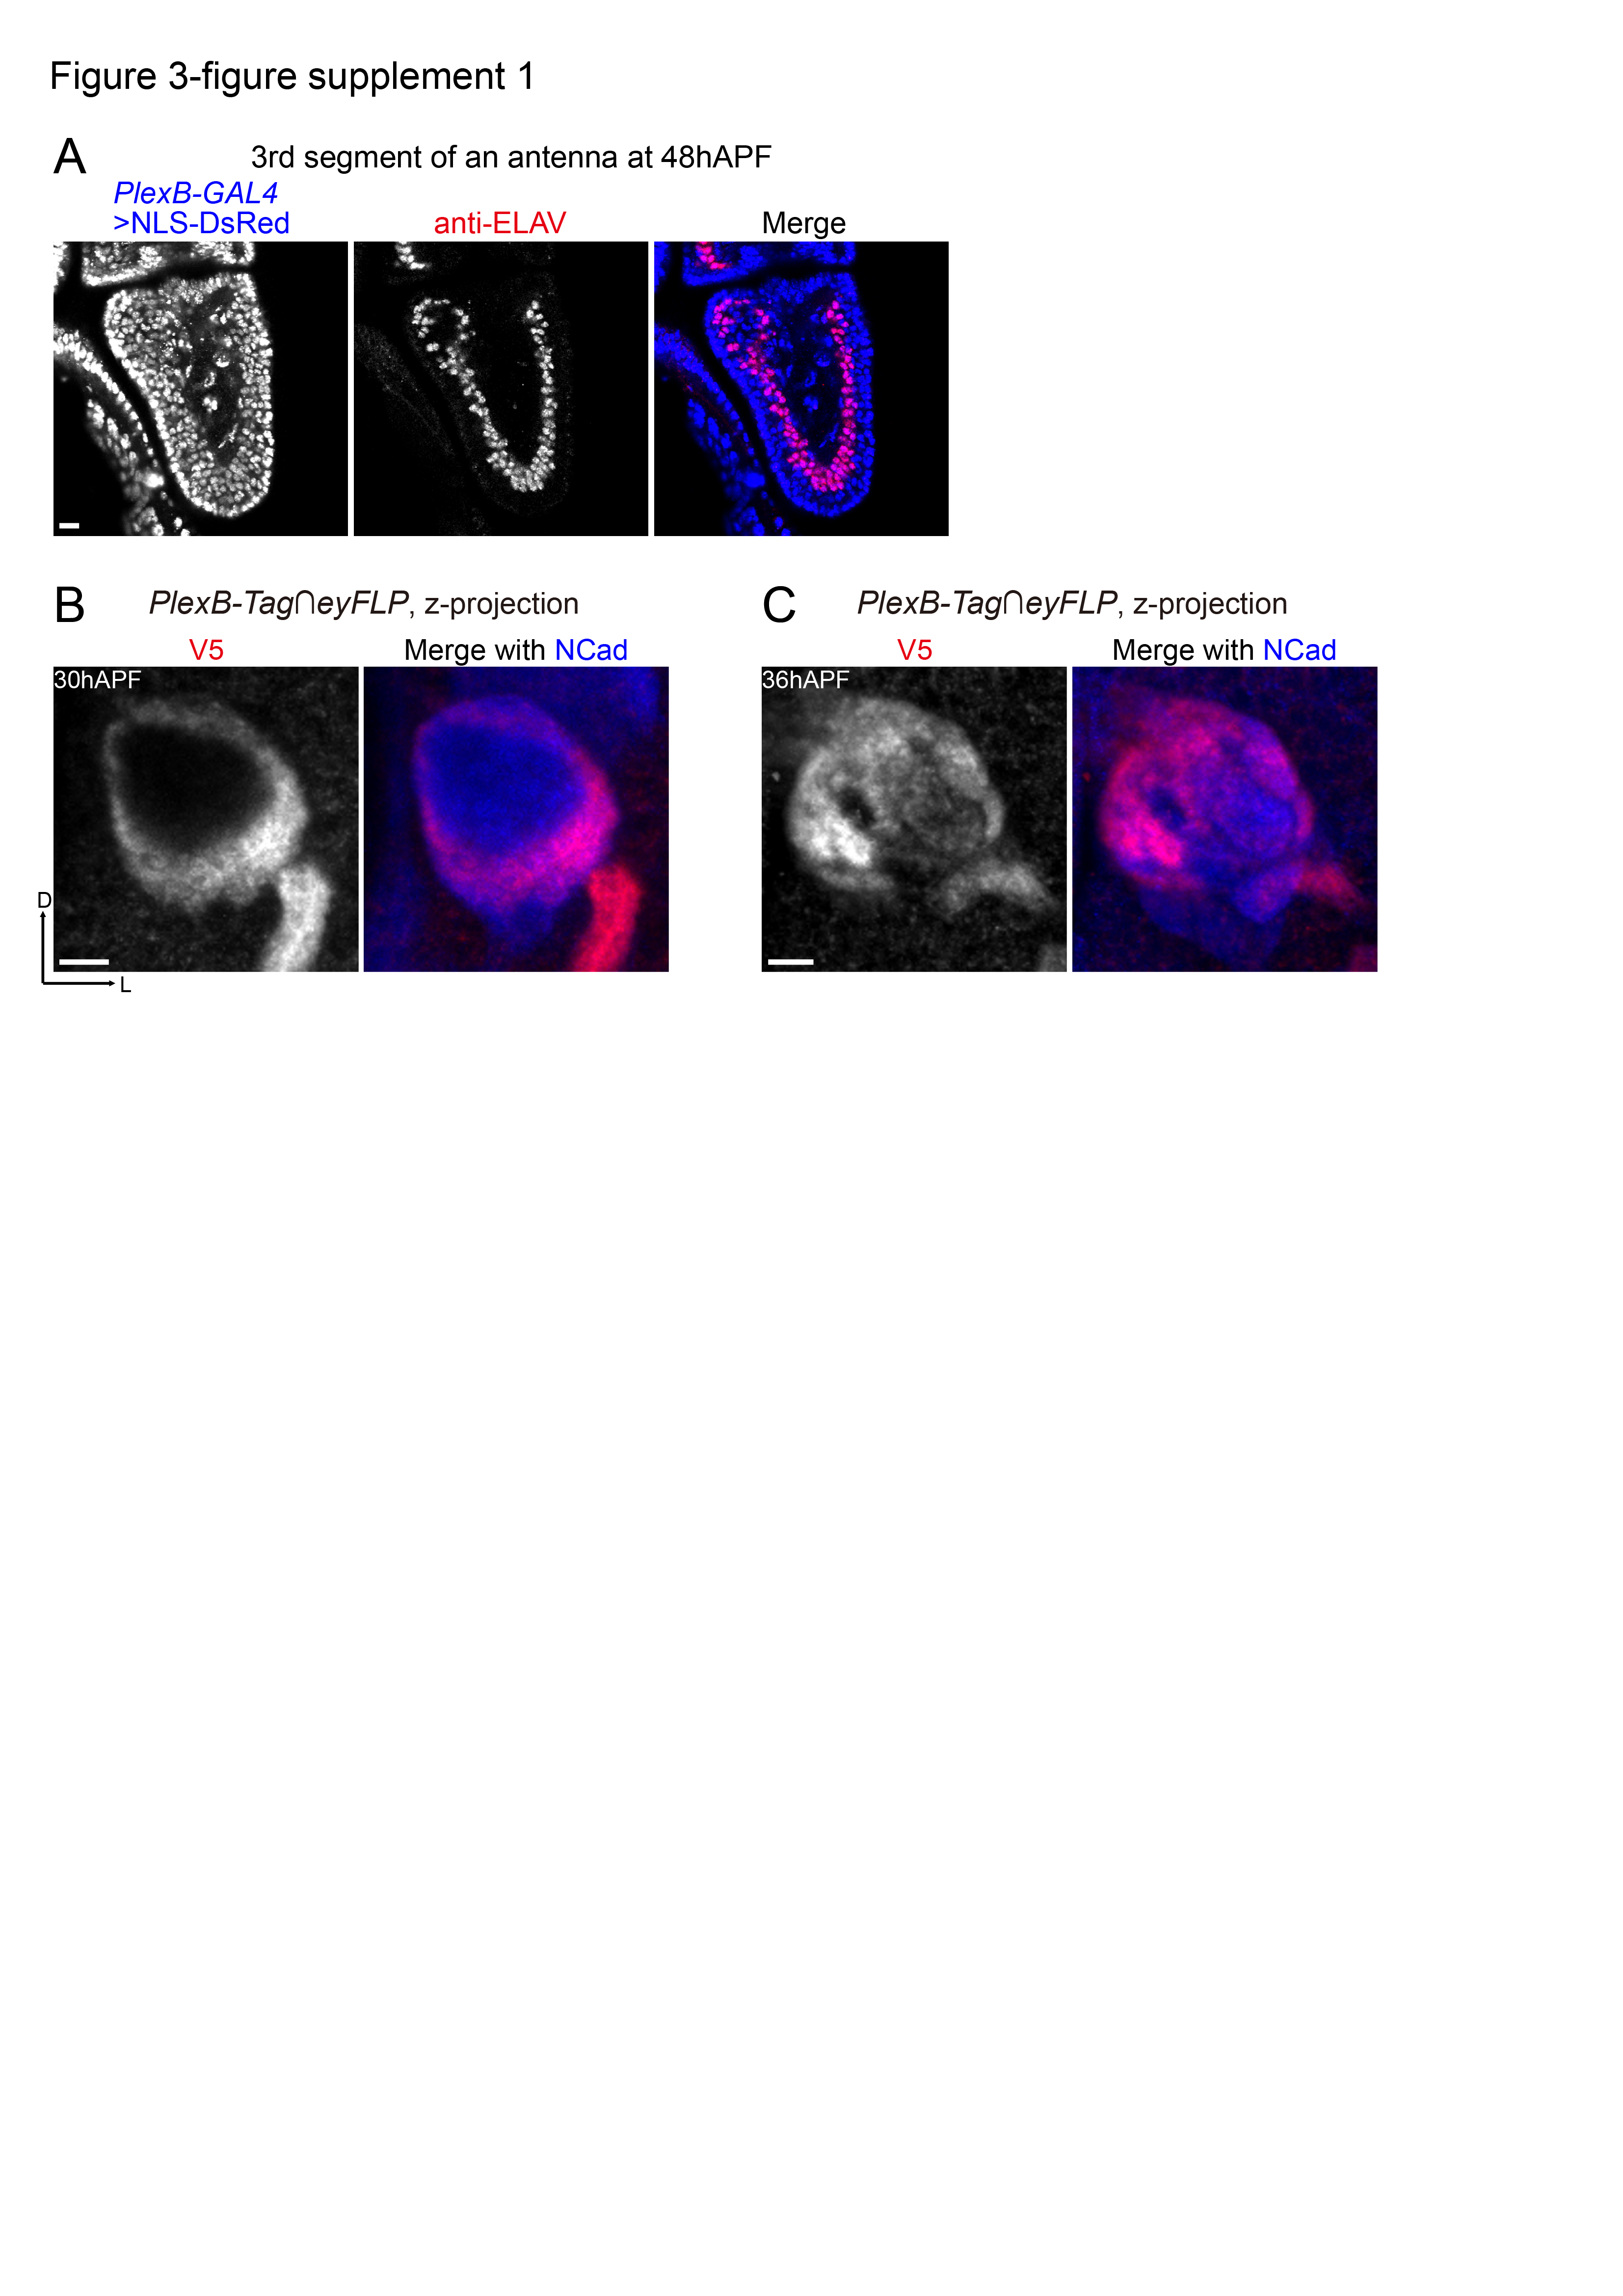

Supplement: supp [file elife-39088-supp-v1.zip › elife_poa_e39088_Figure_3_figure_supplement_1.jpg]
